# Supplementary material
Source: Springer Nature journal article supplement (https://www.springermedizin.de/resource/supplementary/12913_2010_1809_MOESM1_ESM.pdf/9528954)
Supplement: MOESM1 [file 9528954]

NSW Prostate Cancer  
Care and Outcomes  
Study (PCOS)  
Oct 2000 – Oct 2002

Linked by Centre for  
Health Record Linkage

NSW Central Cancer  
Registry (CCR)  
Jan 1999 – Dec 2002

Linked by  
Medicare  
Australia

Medicare and  
Pharmaceutical Claims  
data (MBS, PBS)  
Jan 2000 – Dec 2008

Linked by  
NSW Health

NSW Admitted Patient  
Data Collection (APDC)  
Jul 1998 – Jun 2003
